# Supplementary material for: Role of 53BP1 in end protection and DNA synthesis at DNA breaks
Source: PubMed Central journal article supplement — Genes Dev. 2021 Oct 1;35(19-20):1356–67. doi: 10.1101/gad.348667.121 (PMC8494207; doi:10.1101/gad.348667.121), 2021-10-01
Supplement: supp_gad.348667.121_Supplemental_Fig_S3.pdf [file supp_gad.348667.121_Supplemental_Fig_S3.pdf]

### Paiano\_Supp\_FigS3

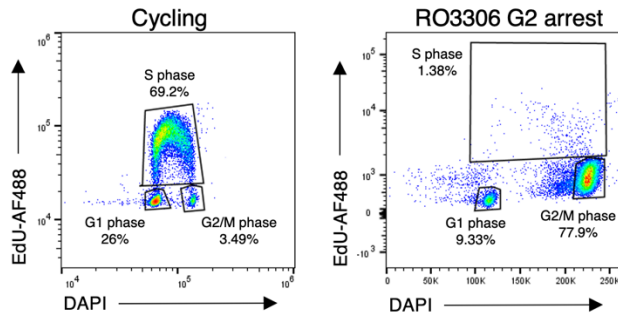

**Supplemental Fig. S3. G2 arrest confirmation.** Cell cycle profiles of *Lig4*<sup>-/-</sup> cells by EdU and DAPI flow cytometry measurements. After 36 hr CDK1 inhibition (10  $\mu$ M RO3306), ~80% of cells are G2 arrested.
