# Supplementary material for: Role of 53BP1 in end protection and DNA synthesis at DNA breaks
Source: PubMed Central journal article supplement — Genes Dev. 2021 Oct 1;35(19-20):1356–67. doi: 10.1101/gad.348667.121 (PMC8494207; doi:10.1101/gad.348667.121), 2021-10-01
Supplement: supp_gad.348667.121_Supplemental_Fig_S4.pdf [file supp_gad.348667.121_Supplemental_Fig_S4.pdf]

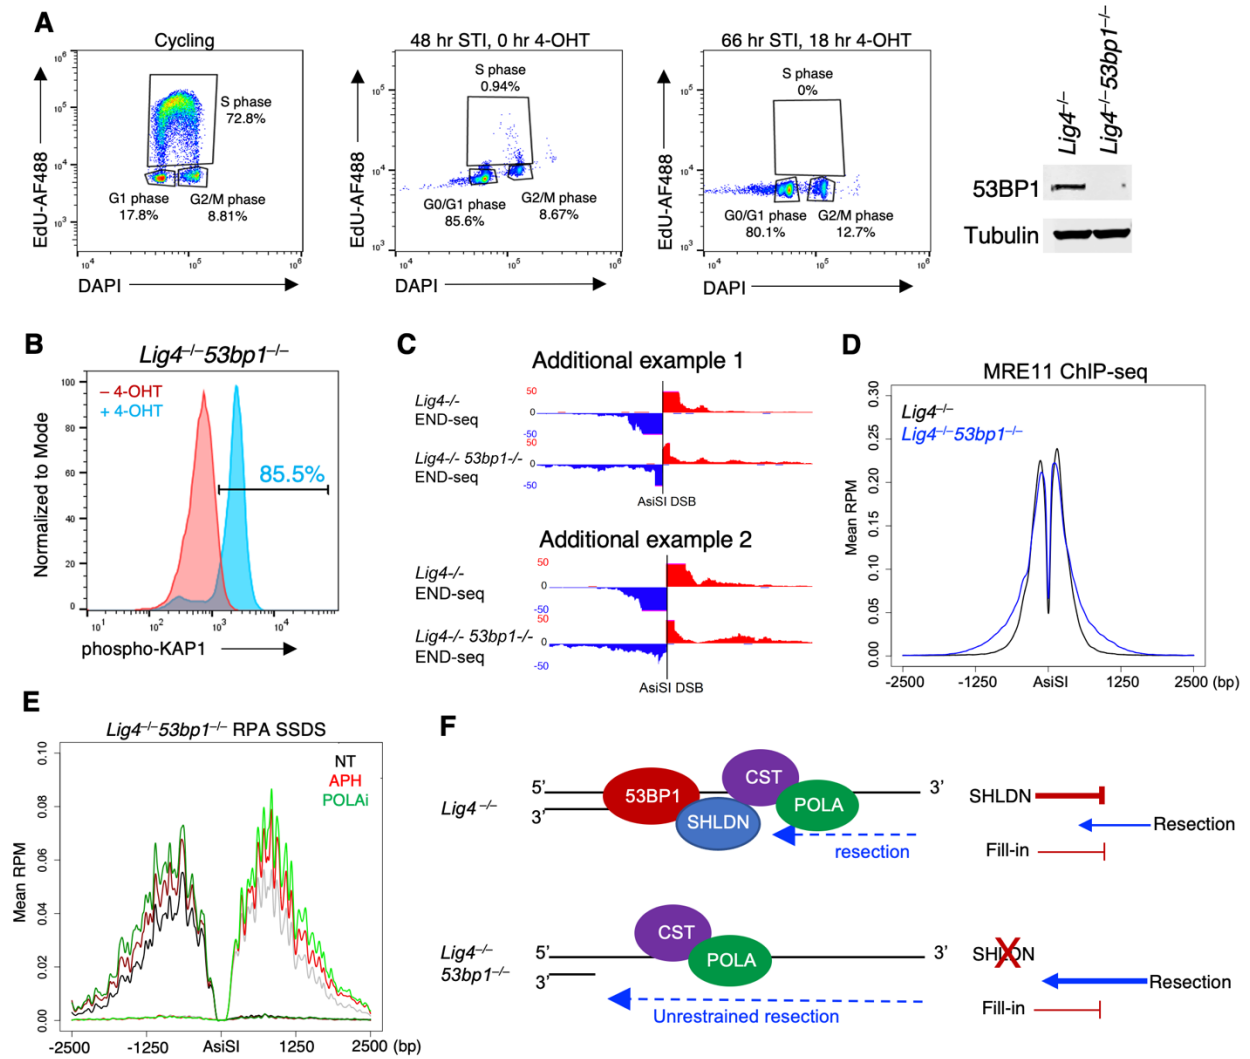

**Supplemental Fig. S4. 53BP1-deficient cells exhibit normal MRE11 recruitment and are largely unaffected by fill-in synthesis inhibition. A)** Cell cycle profiles of

*Lig4<sup>-/-</sup>53bp1<sup>-/-</sup>* G0/G1 arrest by EdU and DAPI flow cytometry measurement. While ~70% of cells are in S phase in cycling cultures, >80% of cells are G0/G1 arrested after 48 hr imatinib (STI) treatment and remain arrested 18 hr later after AsiSI induction.

Western blot (right) in *Lig4<sup>-/-</sup>* or *Lig4<sup>-/-</sup>53bp1<sup>-/-</sup>* pre-B cells confirms the absence of

53BP1 protein. **B)** Phosphorylated KAP1 (phospho-KAP1; double-strand break (DSB)

marker) FACS histograms of G0/G1-arrested *Lig4<sup>-/-</sup>53bp1<sup>-/-</sup>* cells after 6 hr AsiSI

cutting to confirm presence of DSBs. **C)** Genome browser snapshots of two additional

examples of END-seq resection at AsiSI DSBs (Example 1, chr2:32236003-32236010;

Example 2, chr11:120784162-120784170). **D)** Aggregated reads per million (RPM),

averaged across the strongest 200 AsiSI breaks, of MRE11 ChIP-seq signal +/- 2.5 kb

around AsiSI recognition sequences. AsiSI was induced for 6 hr in *Lig4<sup>-/-</sup>* (black) and

*Lig4<sup>-/-</sup>53bp1<sup>-/-</sup>* (blue) cells to determine resection initiation by the recruitment of the

MRE11/NBS1/RAD50 complex. MRE11 ChIP-seq was performed once. **E)** Aggregated

RPA single-strand DNA sequencing (SSDS) in *Lig4<sup>-/-</sup>53bp1<sup>-/-</sup>* cells after 18 hr AsiSI

cutting concurrently treated with 5 μM aphidicolin (APH; red), 1 μM polymerase alpha

inhibitor (POLAi; green), or no treatment (NT; black). RPA SSDS observations were

reproduced with two independent *Lig4<sup>-/-</sup>53bp1<sup>-/-</sup>* clones (see Supplementary Fig. S5).

**F)** Model to explain hyper-resection observed after loss of 53BP1. In NHEJ-deficient

*Lig4<sup>-/-</sup>* cells, in which resection frequently occurs, resection is largely limited by

53BP1/Shieldin (SHLDN) exonuclease blockade, while CST/Polα-initiated fill-in

synthesis plays a more minor, yet significant, role in limiting resection tracks. After loss of 53BP1, end protection is abolished, and unrestrained resection occurs. Pol $\alpha$  is still recruited to ssDNA in the absence of 53BP1, perhaps through CST, yet subsequent fill-in alone is unable to confine resection.
