# Supplementary material for: Role of 53BP1 in end protection and DNA synthesis at DNA breaks
Source: PubMed Central journal article supplement — Genes Dev. 2021 Oct 1;35(19-20):1356–67. doi: 10.1101/gad.348667.121 (PMC8494207; doi:10.1101/gad.348667.121), 2021-10-01
Supplement: supp_gad.348667.121_Supplemental_Fig_S5.pdf [file supp_gad.348667.121_Supplemental_Fig_S5.pdf]

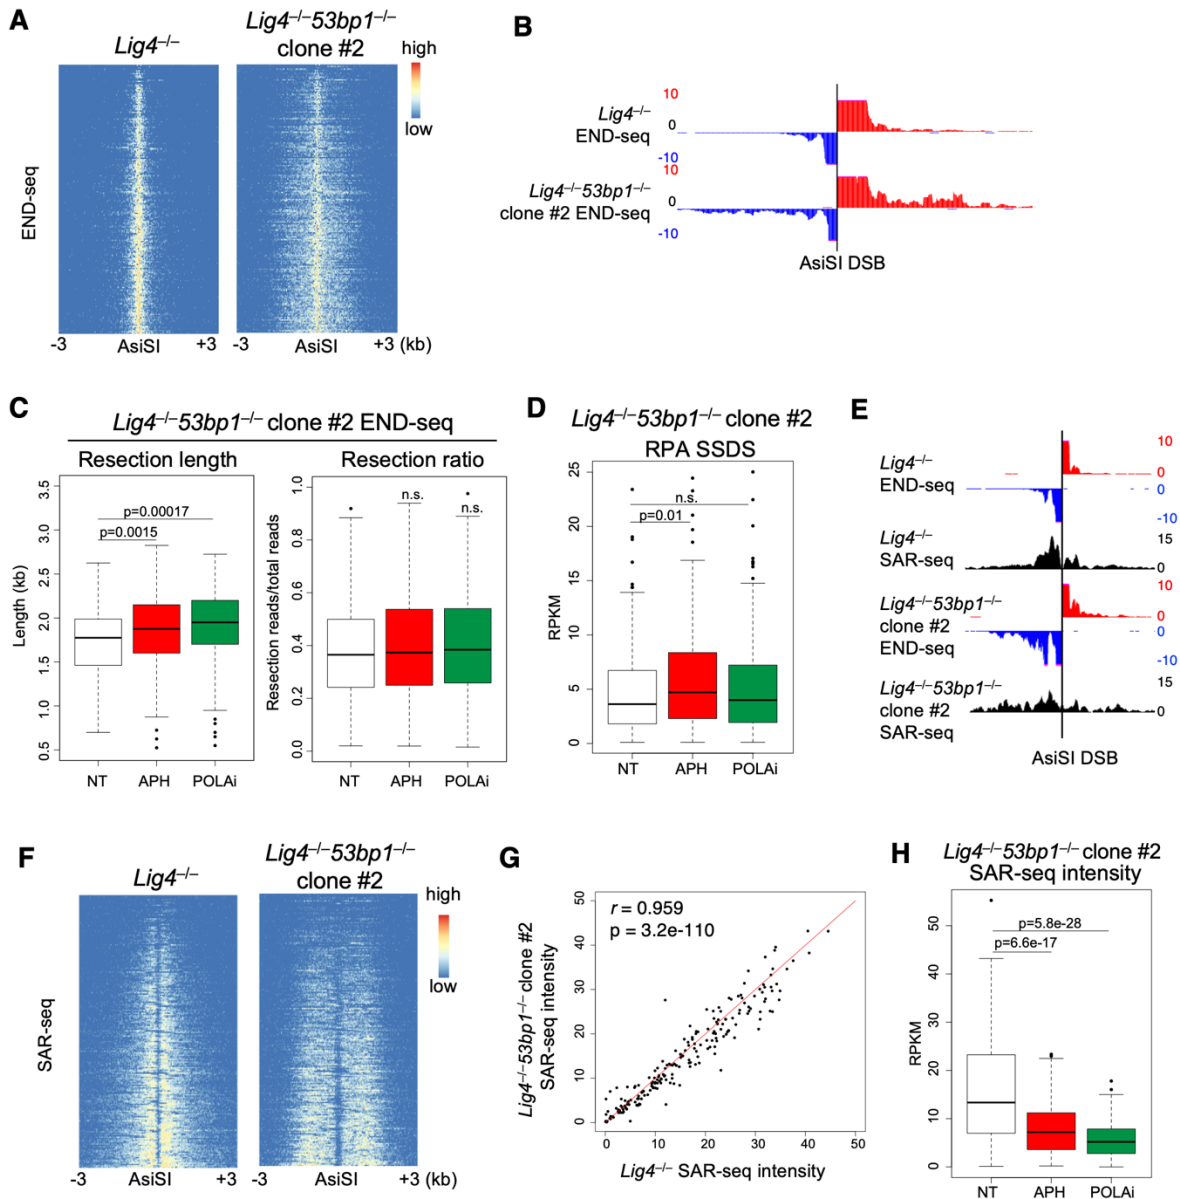

**Supplemental Fig. S5. Verification of 53BP1-null findings in an independently generated 53bp1-KO clone. A)** Heatmaps of END-seq signal +/- 3 kb around the top 200 AsiSI breaks in *Lig4*<sup>-/-</sup> and *Lig4*<sup>-/-</sup>*53bp1*<sup>-/-</sup> clone #2 pre-B cells after 18 hr AsiSI cutting. **B)** Genome browser snapshot of DNA strand-separated END-seq in *Lig4*<sup>-/-</sup> and *Lig4*<sup>-/-</sup>*53bp1*<sup>-/-</sup> clone #2 cells at a single AsiSI break (chr12:111,039,088-111,039,096). **C)** Boxplots of maximum resection lengths per AsiSI site (left) and ratio of resected breaks versus total breaks (right) as detected by END-seq after AsiSI induction with either no additional treatment (NT), 5 μM aphidicolin (APH), or 1 μM DNA Polα inhibitor (POLAi) concurrent treatment. **D)** Boxplots of RPA single-strand DNA sequencing (SSDS) intensity in *Lig4*<sup>-/-</sup>*53bp1*<sup>-/-</sup> clone #2 cells after 18 hr AsiSI cutting with either no additional treatment (NT), 5 μM APH, or 1 μM POLAi concurrent treatment. **E)** Genome browser snapshot of SAR-seq signal at an individual AsiSI DSB with END-seq resection as reference (chr5: 115,630,000-115-635,000). **F)** Heatmaps of SAR-seq signal +/- 3 kb around the top 200 AsiSI sites in *Lig4*<sup>-/-</sup> and *Lig4*<sup>-/-</sup>*53bp1*<sup>-/-</sup> clone #2 cells after 18 hr break induction. **G)** Pearson's correlation of normalized read intensity at each AsiSI break location between *Lig4*<sup>-/-</sup> and *Lig4*<sup>-/-</sup>*53bp1*<sup>-/-</sup> clone #2 SAR-seq from "F". **H)** Boxplots of SAR-seq intensity in *Lig4*<sup>-/-</sup>*53bp1*<sup>-/-</sup> clone #2 cells after 18 hr AsiSI cutting with either no additional treatment (NT), 5 μM APH, or 1 μM POLAi concurrent treatment. All panels show datasets from one experiment and serve as an independent biological replicate to findings in Fig. 5.
